# Supplementary material for: A unique case of polymorphism in polyiodide networks resulting from the reaction of the drug methimazole and I2
Source: Royal Society of Chemistry journal article supplement (doi:10.1039/d3nj00855j), 2023-01-01
Supplement: d3nj00855j1.pdf [file d3nj00855j1.pdf]

## Electronic Supporting Information (ESI)

### A Unique Case of Polymorphism in Polyiodide Networks Resulting from the Reaction of the Drug Methimazole and I<sub>2</sub>.

M. Carla Aragoni,<sup>a</sup> Massimiliano Arca,<sup>a</sup> Francesco Demartin,<sup>b</sup> Alessandra Garau,<sup>a</sup>  
Francesco Isaia,<sup>a,\*</sup> Vito Lippolis,<sup>a</sup> Tiziana Pivetta<sup>a</sup>

<sup>a</sup> Dipartimento di Scienze Chimiche e Geologiche, Università degli Studi di Cagliari, Cittadella Universitaria, 09042 Monserrato (CA), Italy. Tel: +39 070 67544. E-mail: [isaia@unica.it](mailto:isaia@unica.it)

<sup>b</sup> Dipartimento di Chimica, Università degli Studi di Milano, via Golgi 19, 20133 Milano. Italy.

#### CONTENTS

|           |                                                                                                                                                                                                                                    |      |     |
|-----------|------------------------------------------------------------------------------------------------------------------------------------------------------------------------------------------------------------------------------------|------|-----|
| Table S1  | Crystallographic data and structure refinement details                                                                                                                                                                             | page | S2  |
| Table S2  | Compound <b>1-triclinic</b> . Selected interatomic distances (Å) and angles (deg.)                                                                                                                                                 |      | S3  |
| Figure S1 | Compound <b>1-triclinic</b> . The iodide framework along [100].                                                                                                                                                                    |      | S4  |
| Figure S2 | Cation methimazole-disulfide: atom numbering scheme.                                                                                                                                                                               |      | S5  |
| Table S3  | Cation methimazole-disulfide charges of atoms ( e ).                                                                                                                                                                               |      | S5  |
| Figure S3 | <i>Bis</i> -cation methimazole-disulfide: atom numbering scheme.                                                                                                                                                                   |      | S7  |
| Table S4  | <i>Bis</i> -cation methimazole-disulfide charges of atoms ( e ).                                                                                                                                                                   |      | S7  |
| Figure S4 | Polyiodide [I <sub>3</sub> ] <sup>-</sup> : atom numbering scheme.                                                                                                                                                                 |      | S10 |
| Figure S5 | Polyiodide [I <sub>5</sub> ] <sup>-</sup> : atom numbering scheme.                                                                                                                                                                 |      | S10 |
| Table S5  | Polyiodides [I <sub>3</sub> ] <sup>-</sup> and [I <sub>5</sub> ] <sup>-</sup> : atomic charges ( e ).                                                                                                                              |      | S10 |
| Figure S6 | Superposition of the crystal structures of the cations [C <sub>4</sub> H <sub>5</sub> N <sub>2</sub> S(11)-S(21)N <sub>2</sub> C <sub>4</sub> H <sub>6</sub> ] <sup>+</sup> in <b>1-triclinic</b> and <b>1-monoclinic</b> .        |      | S11 |
| Table S6  | Solid state FT-Raman bands (450 – 50 cm <sup>-1</sup> ) of polymorphs <b>1-triclinic</b> and <b>1-monoclinic</b> .                                                                                                                 |      | S11 |
| Figure S7 | UV-Vis spectra of compound [C <sub>4</sub> H <sub>5</sub> N <sub>2</sub> S-SN <sub>2</sub> C <sub>4</sub> H <sub>6</sub> ] <sub>2</sub> I <sub>3</sub> I <sub>5</sub> ] of polymorphs <b>1-triclinic</b> and <b>1-monoclinic</b> . |      | S12 |

**Table S1.** Crystallographic data and structure refinement details for **1-triclinic**.

|                                                                          |                                                                                                   |
|--------------------------------------------------------------------------|---------------------------------------------------------------------------------------------------|
| Compound                                                                 | $[2(\text{C}_4\text{H}_5\text{N}_2\text{S}-\text{SN}_2\text{C}_4\text{H}_6)]\text{I}_3\text{I}_5$ |
| Formula                                                                  | $\text{C}_{16}\text{H}_{22}\text{I}_8\text{N}_8\text{S}_4$                                        |
| Crystal system                                                           | triclinic                                                                                         |
| Space group                                                              | <i>P</i> -1 (no. 2)                                                                               |
| <i>M.W.</i>                                                              | 1469.85                                                                                           |
| <i>a</i> / Å                                                             | 7.0461(9)                                                                                         |
| <i>b</i> / Å                                                             | 11.5109 (14)                                                                                      |
| <i>c</i> / Å                                                             | 23.868(3)                                                                                         |
| $\alpha$ / °                                                             | 91.44(1)                                                                                          |
| $\beta$ / °                                                              | 92.78(1)                                                                                          |
| $\gamma$ / °                                                             | 102.42(1)                                                                                         |
| <i>V</i> / Å <sup>3</sup>                                                | 1887.1(4)                                                                                         |
| <i>Z</i>                                                                 | 2                                                                                                 |
| <i>D<sub>c</sub></i> /g/cm <sup>-3</sup>                                 | 2.587                                                                                             |
| $\mu$ / mm <sup>-1</sup>                                                 | 6.817                                                                                             |
| Measured reflections                                                     | 17105                                                                                             |
| Unique reflections, <i>R</i> <sub>int</sub>                              | 7423, 0.041                                                                                       |
| Observed reflections [ <i>I</i> > 2σ( <i>I</i> )]                        | 4776                                                                                              |
| Absorption correction                                                    | SADABS                                                                                            |
| <i>T</i> <sub>min</sub> , <i>T</i> <sub>max</sub>                        | 0.513, 1.000                                                                                      |
| Parameters refined                                                       | 325                                                                                               |
| <i>R</i>                                                                 | 0.0388                                                                                            |
| <i>wR2</i> [all data]                                                    | 0.0955                                                                                            |
| <i>GOF</i>                                                               | 0.902                                                                                             |
| $\Delta\rho_{\text{min}}$ , $\Delta\rho_{\text{max}}$ /e Å <sup>-3</sup> | -1.1(1), 1.2(1)                                                                                   |

$$R = \frac{\sum ||F_o| - |F_c||}{\sum |F_o|}; wR2 = \left\{ \frac{\sum [w(F_o^2 - F_c^2)^2]}{\sum [w(F_o^2)^2]} \right\}^{1/2};$$

$GOF = \left\{ \frac{\sum [w(F_o^2 - F_c^2)]}{(n-p)} \right\}^{1/2}$  where *n* is the number of reflections and *p* is the number of refined parameters.

**Table S2.** [2(C<sub>4</sub>H<sub>5</sub>N<sub>2</sub>S-SN<sub>2</sub>C<sub>4</sub>H<sub>6</sub>)]I<sub>3</sub>I<sub>5</sub> (**1-triclinic**). Selected interatomic distances (Å) and angles (deg.)

|             |            |             |            |
|-------------|------------|-------------|------------|
| I1-I2       | 2.9532(8)  | I1-I2-I3    | 178.98(2)  |
| I2-I3       | 2.9019(8)  | I4-I5-I6    | 176.63(3)  |
| I4-I5       | 2.7936(9)  | I5-I6-I7    | 96.26(2)   |
| I5-I6       | 3.1134(9)  | I6-I7-I8    | 174.79(2)  |
| I6-I7       | 3.0207(8)  |             |            |
| I7-I8       | 2.8255(8)  |             |            |
| I1...I8     | 4.1238(10) | I3...I3b    | 4.2765(10) |
| I3...I3a    | 3.8282(11) | I4...I7c    | 4.3001(11) |
| I4...I4d    | 3.5752(11) | I5...I6e    | 4.2661(11) |
| I6...I6e    | 3.8254(11) |             |            |
| S11-S21     | 2.088(3)   | S12-S22     | 2.091(3)   |
| S11-C11     | 1.739(7)   | S12-C12     | 1.752(7)   |
| S21-C51     | 1.750(7)   | S22-C52     | 1.758(7)   |
| N11-C11     | 1.317(8)   | N12-C12     | 1.314(8)   |
| N11-C31     | 1.350(9)   | N12-C32     | 1.355(9)   |
| N21-C11     | 1.341(8)   | N22-C12     | 1.342(8)   |
| N21-C21     | 1.354(10)  | N22-C22     | 1.364(9)   |
| N21-C41     | 1.461(10)  | N22-C42     | 1.493(9)   |
| N31-C51     | 1.317(8)   | N32-C52     | 1.316(9)   |
| N31-C61     | 1.357(10)  | N32-C62     | 1.362(9)   |
| N41-C51     | 1.346(8)   | N42-C52     | 1.359(8)   |
| N41-C71     | 1.341(10)  | N42-C72     | 1.356(9)   |
| N41-C81     | 1.476(10)  | N42-C82     | 1.450(10)  |
| C21-C31     | 1.350(11)  | C22-C32     | 1.343(10)  |
| C61-C71     | 1.342(11)  | C62-C72     | 1.338(11)  |
| C11-S11-S21 | 102.0(2)   | C12-S12-S22 | 102.6(2)   |
| C51-S21-S11 | 103.0(2)   | C52-S22-S12 | 103.0(2)   |
| C11-N11-C31 | 109.3(6)   | C12-N12-C32 | 109.3(6)   |
| C11-N21-C21 | 109.3(7)   | C11-N21-C41 | 125.7(6)   |
| C21-N21-C41 | 125.0(7)   | C12-N22-C22 | 108.3(6)   |
| C12-N22-C42 | 125.0(6)   | C22-N22-C42 | 126.7(6)   |
| C51-N31-C61 | 105.5(6)   | C52-N32-C62 | 104.9(6)   |
| C71-N41-C51 | 106.5(6)   | C72-N42-C52 | 104.6(6)   |
| C71-N41-C81 | 125.9(7)   | C72-N42-C82 | 127.7(7)   |
| C51-N41-C81 | 127.5(7)   | C52-N42-C82 | 127.7(6)   |
| N11-C11-N21 | 107.3(6)   | N12-C12-N22 | 107.9(6)   |
| N11-C11-S11 | 126.5(5)   | N12-C12-S12 | 126.0(5)   |
| N21-C11-S11 | 126.1(6)   | N22-C12-S12 | 125.7(5)   |
| C31-C21-N21 | 106.3(7)   | C32-C22-N22 | 107.0(7)   |

|                 |          |                 |          |
|-----------------|----------|-----------------|----------|
| C21-C31-N11     | 107.7(7) | C22-C32-N12     | 107.4(7) |
| N31-C51-N41     | 111.1(6) | N32-C52-N42     | 112.5(6) |
| N31-C51-S21     | 124.5(5) | N32-C52-S22     | 124.5(5) |
| N41-C51-S21     | 124.2(6) | N42-C52-S22     | 122.9(6) |
| C71-C61-N31     | 109.3(7) | C72-C62-N32     | 109.5(7) |
| N41-C71-C61     | 107.5(7) | N42-C72-C62     | 108.6(7) |
|                 |          |                 |          |
| C11-S11-S21-C51 | 94.3(3)  | C12-S12-S22-C52 | -90.6(3) |

**Hydrogen bonds**

|           |          |               |          |
|-----------|----------|---------------|----------|
| N12...N31 | 2.712(8) | N12-H12...N31 | 176.1(4) |
| N11...N32 | 2.690(9) | N11-H11...N32 | 176.4(4) |

Symmetry codes: a = 1 - x, 2 - y, 1 - z; b = 2 - x, 2 - y, 1 - z; c = 1 + x, y, z; d = 4-x, 1 - y, -z; e = 3 - x, 2 - y, -z.

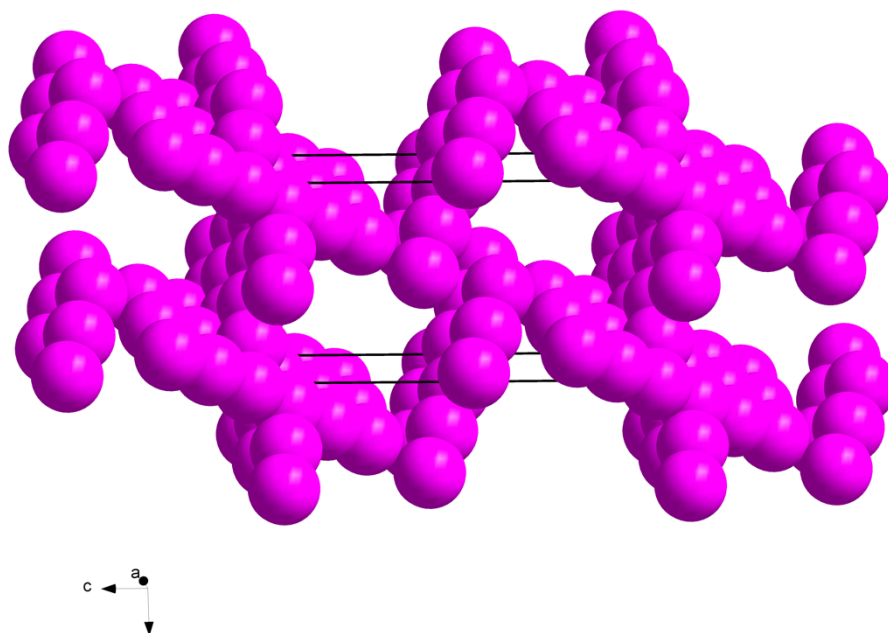

**Figure S1.** Compound **1-triclinic**. The iodide framework seen almost along [100]. The Iodine atoms are drawn with their van der Waals radii to show the channels where the dimeric units made by the two hydrogen-bonded independent monocations are hosted.

Cation methimazole-disulfide [ $C_4H_5N_2S-SN_2C_4H_6$ ]<sup>+</sup>

|                 |                   |
|-----------------|-------------------|
| <b>Name:</b>    | DA208             |
| <b>Formula:</b> | $C_8H_{11}N_4S_2$ |

|                   |                       |
|-------------------|-----------------------|
| <b>Job type:</b>  | Energy                |
| <b>Method:</b>    | $\omega$ B97X-D       |
| <b>Basis set:</b> | 6-31G*                |
| <b>Charge:</b>    | +1                    |
| <b>Energy:</b>    | -1326.400982 hartrees |

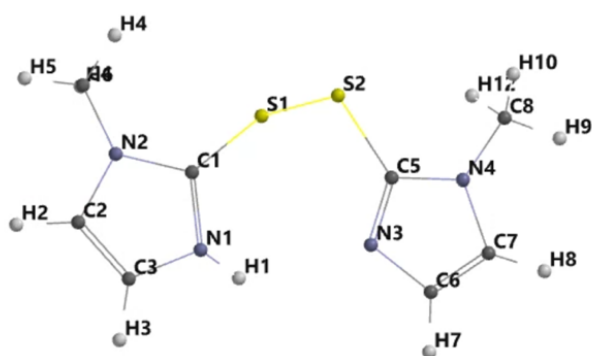

**Figure S2.** Cation methimazole-disulfide: atom numbering scheme.

**Table S3.** Cation methimazole-disulfide [ $C_4H_5N_2S-SN_2C_4H_6$ ]<sup>+</sup> atomic charges ( $|e|$ ).

| Atom Label | Natural charge | Mulliken charge | Electrostatic charge |
|------------|----------------|-----------------|----------------------|
| <b>C1</b>  | +0.252         | +0.272          | +0.165               |
| <b>C2</b>  | -0.050         | +0.025          | -0.283               |
| <b>C3</b>  | -0.043         | -0.001          | +0.000               |
| <b>C4</b>  | -0.510         | -0.413          | -0.695               |
| <b>C5</b>  | +0.127         | +0.183          | +0.273               |
| <b>C6</b>  | -0.096         | -0.078          | +0.093               |

|            |        |        |        |
|------------|--------|--------|--------|
| <b>C7</b>  | -0.061 | +0.008 | -0.431 |
| <b>C8</b>  | -0.491 | -0.383 | -0.763 |
| <b>H1</b>  | +0.488 | +0.426 | +0.384 |
| <b>H2</b>  | +0.290 | +0.271 | +0.253 |
| <b>H3</b>  | +0.292 | +0.275 | +0.210 |
| <b>H4</b>  | +0.282 | +0.254 | +0.232 |
| <b>H5</b>  | +0.276 | +0.243 | +0.262 |
| <b>H6</b>  | +0.271 | +0.245 | +0.256 |
| <b>H7</b>  | +0.256 | +0.206 | +0.153 |
| <b>H8</b>  | +0.267 | +0.235 | +0.260 |
| <b>H9</b>  | +0.264 | +0.222 | +0.278 |
| <b>H10</b> | +0.260 | +0.225 | +0.245 |
| <b>H12</b> | +0.253 | +0.213 | +0.218 |
| <b>N1</b>  | -0.520 | -0.512 | -0.294 |
| <b>N2</b>  | -0.350 | -0.390 | +0.343 |
| <b>N3</b>  | -0.503 | -0.438 | -0.532 |
| <b>N4</b>  | -0.380 | -0.391 | +0.372 |
| <b>S1</b>  | +0.185 | +0.135 | -0.030 |
| <b>S2</b>  | +0.239 | +0.167 | +0.031 |

*Bis*-cation methimazole-disulfide  $\{[C_4H_5N_2S-SN_2C_4H_6]^+\}_2$

|          |                    |
|----------|--------------------|
| Name:    | DA208              |
| Formula: | $2C_8H_{11}N_4S_2$ |

|            |                       |
|------------|-----------------------|
| Job type:  | Energy                |
| Method:    | $\omega$ B97X-D       |
| Basis set: | 6-31G*                |
| Charge:    | +2                    |
| Energy:    | -2652.755824 hartrees |

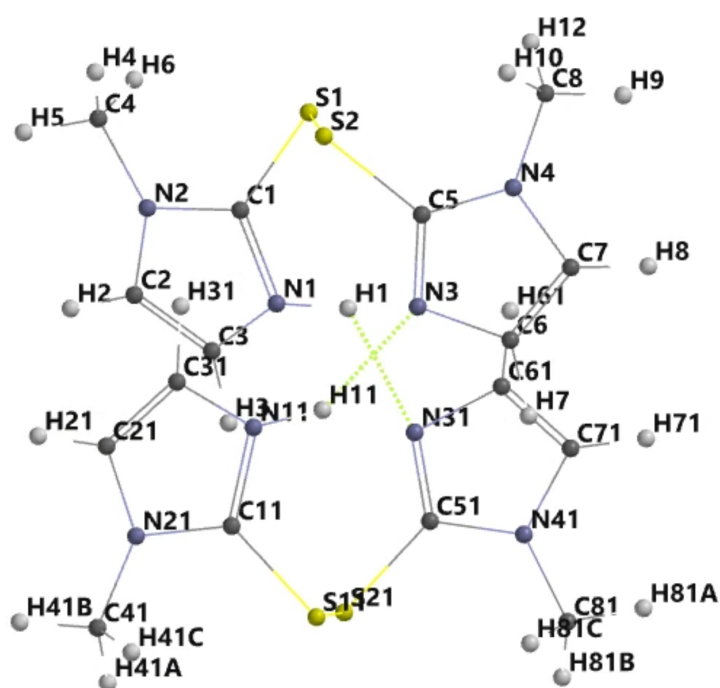

Figure S3. *Bis*-cation methimazole-disulfide: atom numbering scheme.

**Table S4.** *Bis*-cation methimazole disulfide  $\{[C_4H_5N_2S-SN_2C_4H_6]^+\}_2$  atomic charges (e).

| Atom Label | Natural charge | Mulliken charge | Electrostatic charge |
|------------|----------------|-----------------|----------------------|
| <b>C1</b>  | +0.231         | +0.244          | +0.273               |
| <b>C2</b>  | -0.051         | +0.021          | -0.205               |
| <b>C3</b>  | -0.036         | -0.008          | +0.010               |
| <b>C4</b>  | -0.514         | -0.420          | -0.613               |
| <b>C5</b>  | +0.156         | +0.205          | +0.235               |
| <b>C6</b>  | -0.087         | -0.045          | -0.023               |
| <b>C7</b>  | -0.055         | +0.005          | -0.285               |
| <b>C8</b>  | -0.496         | -0.393          | -0.755               |
| <b>C11</b> | +0.242         | +0.256          | +0.158               |
| <b>C21</b> | -0.041         | +0.028          | -0.310               |
| <b>C31</b> | -0.048         | -0.020          | +0.118               |
| <b>C41</b> | -0.514         | -0.420          | -0.590               |
| <b>C51</b> | +0.144         | +0.188          | +0.292               |
| <b>C61</b> | -0.096         | -0.032          | -0.049               |
| <b>C71</b> | -0.056         | -0.040          | -0.214               |
| <b>C81</b> | -0.495         | -0.402          | -0.594               |
| <b>H1</b>  | +0.493         | +0.450          | +0.388               |
| <b>H2</b>  | +0.293         | +0.278          | +0.245               |
| <b>H3</b>  | +0.298         | +0.275          | +0.148               |
| <b>H4</b>  | +0.281         | +0.252          | +0.211               |
| <b>H5</b>  | +0.281         | +0.250          | +0.256               |
| <b>H6</b>  | +0.278         | +0.257          | +0.256               |
| <b>H7</b>  | +0.246         | +0.196          | +0.127               |
| <b>H8</b>  | +0.276         | +0.251          | +0.240               |



|             |        |        |        |
|-------------|--------|--------|--------|
| <b>H9</b>   | +0.273 | +0.237 | +0.285 |
| <b>H10</b>  | +0.268 | +0.237 | +0.253 |
| <b>H11</b>  | +0.495 | +0.442 | +0.369 |
| <b>H12</b>  | +0.262 | +0.227 | +0.239 |
| <b>H21</b>  | +0.289 | +0.277 | +0.266 |
| <b>H31</b>  | +0.281 | +0.263 | +0.100 |
| <b>H61</b>  | +0.250 | +0.206 | +0.144 |
| <b>H71</b>  | +0.274 | +0.245 | +0.224 |
| <b>H41A</b> | +0.283 | +0.256 | +0.207 |
| <b>H41B</b> | +0.281 | +0.251 | +0.247 |
| <b>H41C</b> | +0.276 | +0.254 | +0.246 |
| <b>H81A</b> | +0.271 | +0.235 | +0.248 |
| <b>H81B</b> | +0.274 | +0.250 | +0.218 |
| <b>H81C</b> | +0.250 | +0.218 | +0.193 |
| <b>N1</b>   | -0.524 | -0.522 | -0.354 |
| <b>N2</b>   | -0.348 | -0.392 | +0.179 |
| <b>N3</b>   | -0.579 | -0.508 | -0.487 |
| <b>N4</b>   | -0.366 | -0.394 | +0.313 |
| <b>N11</b>  | -0.539 | -0.540 | -0.330 |
| <b>N21</b>  | -0.347 | -0.392 | +0.273 |
| <b>N31</b>  | -0.552 | -0.493 | -0.413 |
| <b>N41</b>  | -0.375 | -0.376 | +0.183 |
| <b>S1</b>   | +0.215 | +0.176 | -0.008 |
| <b>S2</b>   | +0.220 | +0.141 | +0.045 |
| <b>S11</b>  | +0.194 | +0.147 | +0.009 |
| <b>S21</b>  | +0.246 | +0.177 | +0.034 |

## Polyiodides $I_3^-$ and $I_5^-$

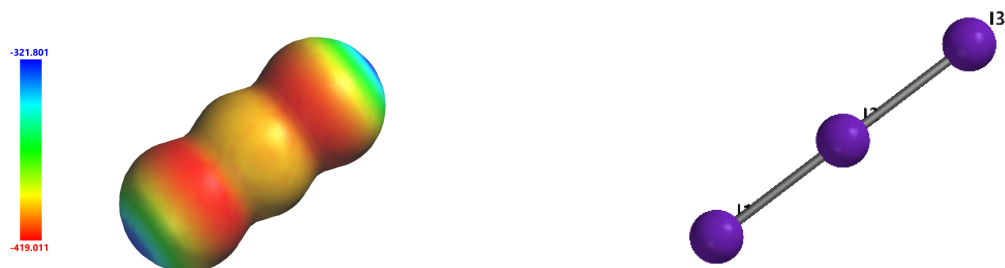

Figure S4. Polyiodide  $[I_3]^-$ : atom numbering scheme.

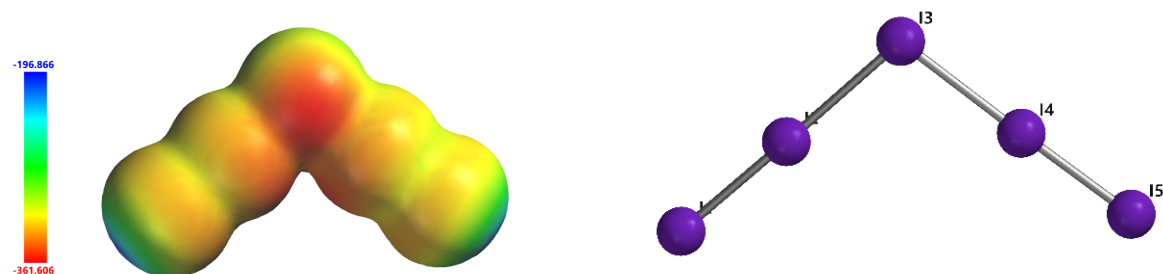

Figure S5. Polyiodide  $[I_5]^-$ : atom numbering scheme.

Table S5. Polyiodides  $[I_3]^-$  and  $[I_5]^-$ : atomic charges ( $e$ ).

| Atom Label | Natural charge | Mulliken charge | Electrostatic charge |
|------------|----------------|-----------------|----------------------|
| I1         | -0.484         | -0.491          | -0.454               |
| I2         | -0.032         | -0.017          | -0.092               |
| I3         | -0.484         | -0.491          | -0.454               |

| Atom Label | Natural charge | Mulliken charge | Electrostatic charge |
|------------|----------------|-----------------|----------------------|
| I1         | -0.311         | -0.324          | -0.288               |
| I2         | -0.007         | +0.012          | -0.085               |
| I3         | -0.374         | -0.384          | -0.266               |
| I4         | -0.006         | +0.012          | -0.078               |
| I5         | -0.303         | -0.316          | -0.283               |

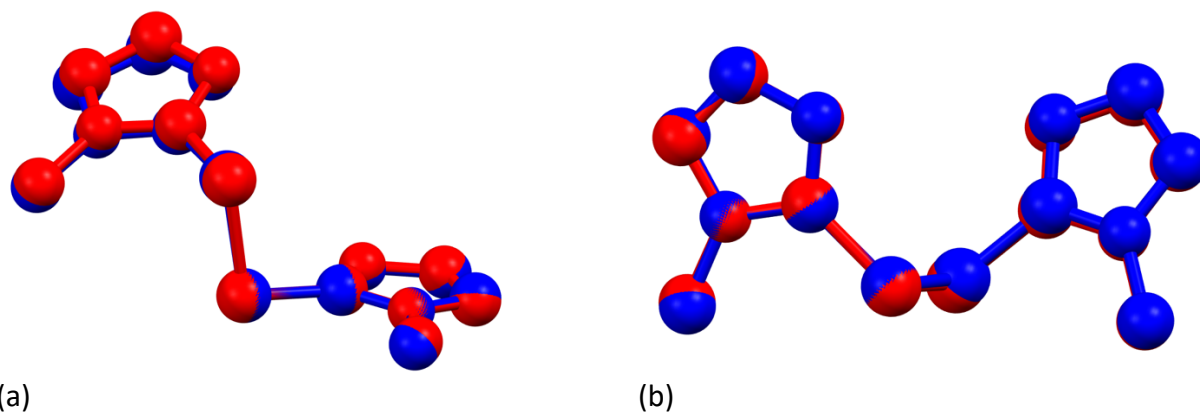

**Figure S6.** Side view (a) and front view (b) of the superposition of the crystal structures of the cations  $[\text{C}_4\text{H}_5\text{N}_2\text{S}(11)\text{-S}(21)\text{N}_2\text{C}_4\text{H}_6]^+$  (**1-triclinic**, red) and  $[\text{C}_4\text{H}_5\text{N}_2\text{S}(1)\text{-S}(4)\text{N}_2\text{C}_4\text{H}_6]^+$  (**1-monoclinic**, XIVBEJ, blue). H-atoms have been omitted for clarity.

**Table S6.** Solid state FT-Raman bands ( $450 - 50 \text{ cm}^{-1}$ ) of polymorphs **1-triclinic** and **1-monoclinic**, [**1** =  $(\text{C}_4\text{H}_5\text{N}_2\text{S-SN}_2\text{C}_4\text{H}_6)_2\text{I}_3\text{I}_5$ ].

| Compound            | Polyiodide types                                                 | Bands (assignt.) <sup>a</sup>                                | I1-I2-I3 <sup>b</sup> (Å)    | I4-I5⋯I6⋯I7-I8 <sup>c</sup> (Å)                            |
|---------------------|------------------------------------------------------------------|--------------------------------------------------------------|------------------------------|------------------------------------------------------------|
| <b>1-triclinic</b>  | asymmetric $\text{I}_3^-$                                        | 112 ( $\nu_1$ ), 132 ( $\nu_3$ )                             | I1-I2 2.9532<br>I2-I3 2.9019 |                                                            |
|                     | V-shaped $\text{I}_5^-$ : $\text{I}^- \rightarrow 2(\text{I}_2)$ | 160 [ $\nu_1(\text{I7-I8})$ ], 172 [ $\nu_1(\text{I5-I4})$ ] |                              | I6-I5 3.113<br>I6-I7 3.020<br>I5-I4 2.7936<br>I7-I8 2.8255 |
| <b>1-monoclinic</b> | symmetric $\text{I}_3^-$                                         | 113 ( $\nu_1$ )                                              | I1-I2 2.903<br>I2-I3 2.909   |                                                            |
|                     | V-shaped $\text{I}_5^-$ : $\text{I}^- \rightarrow 2(\text{I}_2)$ | 153 [ $\nu_1(\text{I7-I8})$ ], 166 [ $\nu_1(\text{I5-I4})$ ] |                              | I6-I5 3.245<br>I6-I7 3.118<br>I5-I4 2.742<br>I7-I8 2.811   |

<sup>a</sup> ( $\nu_1$ ) symmetrical stretching, ( $\nu_3$ ) antisymmetrical stretching; <sup>b</sup> Angle I1-I2-I3: **1-triclinic** 178.98°, **1-monoclinic** 176.20°; <sup>c</sup> Angle I5-I6-I7: **1-triclinic** 96.35°, **1-monoclinic** 100.87°.

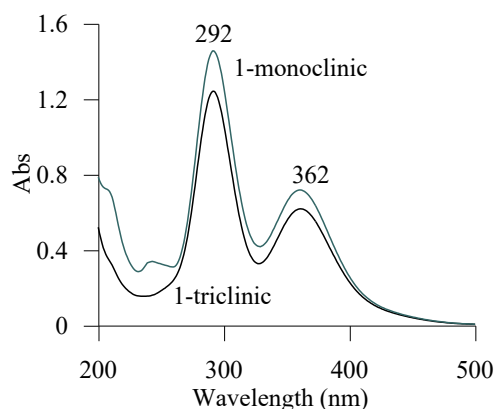

**Figure S7.** UV-Vis spectra of compound [C<sub>4</sub>H<sub>5</sub>N<sub>2</sub>S-SN<sub>2</sub>C<sub>4</sub>H<sub>6</sub>]<sub>2</sub>I<sub>3</sub>I<sub>5</sub> in polymorphs **1-triclinic** and **1-monoclinic**. **1-triclinic** (CH<sub>2</sub>Cl<sub>2</sub>, *T* = 20 °C, *M* = 1.56 × 10<sup>-5</sup>; λ = 292 and 362 nm); **1-monoclinic** (CH<sub>2</sub>Cl<sub>2</sub>, *T* = 20 °C, *M* = 1.84 × 10<sup>-5</sup>; λ = 292 and 362 nm).
